# Supplementary material
Source: PubMed Central journal article supplement (PMC1456932)
Supplement: 7601080s2.pdf [file 7601080s2.pdf]

**Supplementary Table 1.** Primers utilized for site directed mutagenesis

---

|          |                                         |
|----------|-----------------------------------------|
| 5'Y854F  | GTGGTGGTGCATT <u>TGG</u> AGGTTTCTGTG    |
| 3'Y854F  | CACAGAAACCTCCAAATGCACCACCAC             |
| 5'E94Q   | GTACCCGGTAAAAC <u>AG</u> CCATTTGTTGAAC  |
| 3'E94Q   | GTTCAACAAATGGCTGTTTTACCGGGTAC           |
| 5'N109A  | GCATACTTTTCTAG <u>CT</u> GCATTCACATATC  |
| 3'N109A  | GATATGTGAATGCAGCTAGAAAAGTATGC           |
| 5'E177Q  | TGTTGTTTTTAAT <u>CAG</u> ATGAAAGGGGTCT  |
| 3'E177Q  | AGACCCCTTTCATCTGATTAAAAACAACA           |
| 5'R848K  | ATGGGATCGTGTTAA <u>AG</u> TAAGTGGTGGTG  |
| 3'R848K  | CACCACCACTTACTTTAACACGATCCCAT           |
| 5'R848A  | ATGGGATCGTGTT <u>GCT</u> GTAAGTGGTGGTG  |
| 3'R848A  | CACCACCACTTACAGCAACACGATCCCAT           |
| 5'K171C  | AGACATATCTTACT <u>GCG</u> GGTGTGTTTTTA  |
| 3'K171C  | TAAAAACAACACCGCAGTAAGATATGTCT           |
| 5'G852C  | TCGTGTAAGTGGT <u>TGT</u> GCATATGGAGGTT  |
| 3'G852C  | AACCTCCATATGCACAACCACTTACACGA           |
| 5'K1799C | TTTTAATGAGATG <u>TGC</u> GGGGTCTATTCAC  |
| 3'K1799C | GTGAATAGACCCCGCACATCTCATTAATA           |
| 5'Q810C  | TGTAATACCAACCT <u>TGC</u> GTAAACTATGTTG |
| 3'Q810C  | CAACATAGTTTACGCAGGTTGGTATTACA           |
| 5'E345C  | AAGCGGTTTAGGAT <u>TGC</u> GCTCTTGTCAGTA |
| 3'E345C  | TACTGACAAGAGCGCATCCTAAACCGCTT           |
| 5'S682C  | TAAACAGTTTGTCT <u>GT</u> CAAAGCAGAGCAC  |
| 3'S682C  | GTGCTCTGCTTTGACAGACAAACTGTTTA           |
| 5'A331C  | GCTGGGGACTCCTT <u>GTT</u> CACCACTAAGAA  |
| 3'A331C  | TTCTTAGTGGTGAACAAGGAGTCCCCAGC           |
| 5'N615C  | TTTTGTTCAACTTT <u>TGT</u> CAGTTGATTGGAA |
| 3'N615C  | TTCCAATCAACTGACAAAGTTGAACAAAA           |

---

The site of mutation is underlined
